# Supplementary material for: OSMAC-Based Discovery and Biosynthetic Gene Clusters Analysis of Secondary Metabolites from Marine-Derived Streptomyces globisporus SCSIO LCY30
Source: MDPI journal article supplement (doi:10.3390/md22010021), 2023-12-28
Supplement: s1 [file s1]

## Supporting Information

# OSMAC-Based Discovery and Biosynthetic Gene Clusters Analysis of Secondary Metabolites from Marine-Derived *Streptomyces globisporus* SCSIO LCY30

Yanqing Li <sup>1,2,3</sup>, Naying Gong <sup>4</sup>, Le Zhou <sup>1,3</sup>, Zhijie Yang <sup>1,2,3</sup>, Hua Zhang <sup>4</sup>, Yucheng Gu <sup>5</sup>, Junying Ma <sup>1,2,3,\*</sup> and Jianhua Ju <sup>1,2,3,\*</sup>

1 CAS Key Laboratory of Tropical Marine Bio-Resources and Ecology, RNAM Center for Marine Microbiology, Guangdong Key Laboratory of Marine Materia Medica, South China Sea Institute of Oceanology, Chinese Academy of Sciences, Guangzhou 510301, China

2 University of Chinese Academy of Sciences, Beijing 110039, China

3 Southern Marine Science and Engineering Guangdong Laboratory (Guangzhou), Guangzhou 511458, China

4 Guangdong Provincial Key Laboratory of Medical Molecular Diagnostics, Institute of Laboratory Medicine, Guangdong Medical University, Dongguan 523808, China; huazhang@gdmu.edu.cn (H.Z.)

5 Syngenta Jealott's Hill International Research Centre, Bracknell RG42 6EY, Berkshire, UK

\* Correspondence: majunying@scsio.ac.cn (J.M.); jju@scsio.ac.cn (J.J.); Tel.: +86-20-8902-3028 (J.J.)

**Table S1.** The antiSMASH-predicted BGCs for *Streptomyces* sp. SCSIO LCY30

| BGC       | From      | To        | Type                                               | Most similar known cluster | Similarity |
|-----------|-----------|-----------|----------------------------------------------------|----------------------------|------------|
| Cluster1  | 111,597   | 131,563   | terpene                                            | 2-methylisoborneol         | 100%       |
| Cluster2  | 175,613   | 185,779   | butyrolactone                                      | coelimycin P1              | 16%        |
| Cluster3  | 213,615   | 280,831   | NRPS, terpene, NAPAA                               | stenothricin               | 13%        |
| Cluster4  | 307,996   | 353,352   | NRPS                                               | streptobactin              | 100%       |
| Cluster5  | 360,960   | 410,654   | NRPS                                               | coelichelin                | 81%        |
| Cluster6  | 411,713   | 485,146   | terpene, NRPS                                      | isorenieratene             | 100%       |
| Cluster7  | 496,705   | 535,481   | T3PKS                                              | herboxidiene               | 7%         |
| Cluster8  | 1,133,865 | 1,152,667 | terpene                                            | steffimycin D              | 19%        |
| Cluster9  | 1,585,298 | 1,595,726 | ecotine                                            | ectoine                    | 100%       |
| Cluster10 | 2,213,771 | 2,286,646 | NRPS, NRPS-like, T3PKS                             | viguiepinol                | 73%        |
| Cluster11 | 2,608,509 | 2,638,799 | lanthipeptide-class-ii,<br>lanthipeptide-class-iii |                            |            |
| Cluster12 | 2,693,162 | 2,703,155 | siderophore                                        | desferrioxamin B           | 100%       |
| Cluster13 | 3,096,186 | 3,128,710 | thiopeptide, LAP                                   |                            |            |
| Cluster14 | 3,806,311 | 3,829,364 | lanthipeptide-class-i                              |                            |            |
| Cluster15 | 4,456,955 | 4,479,652 | lassopeptide                                       | keywimysin                 | 100%       |
| Cluster16 | 4,612,207 | 4,621,963 | butyrolactone                                      | kedarcidin                 | 1%         |
| Cluster17 | 5,195,441 | 5,236,957 | T1PKS                                              |                            |            |
| Cluster18 | 5,332,444 | 5,355,164 | lanthipeptide-class-iii                            | AmfS                       | 100%       |
| Cluster19 | 5,684,214 | 5,703,231 | terpene                                            |                            |            |
| Cluster20 | 5,724,303 | 5,815,609 | T2PKS, T1PKS, PKS-like, phenazine                  | streptophenazines          | 100%       |
| Cluster21 | 6,163,107 | 6,177,812 | siderophore                                        | ficellomycin               | 3%         |
| Cluster22 | 6,251,244 | 6,323,647 | NRPS, NRPS-like                                    | daptomycin                 | 14%        |
| Cluster23 | 6,504,656 | 6,513,179 | RiPP-like                                          |                            |            |
| Cluster24 | 7,096,294 | 7,122,422 | terpene                                            | hopene                     | 69%        |
| Cluster25 | 7,176,618 | 7,225,311 | NRPS, T1PKS                                        | SGR PTMs                   | 100%       |
| Cluster26 | 7,316,149 | 7,357,492 | butyrolactone, terpene,<br>lanthipeptide-class-i   | isorenieratene             | 87%        |
| Cluster27 | 7,392,554 | 7,403,351 | RiPP-like                                          | tetronasin                 | 3%         |
| Cluster28 | 7,608,211 | 7,618,690 | melanin                                            | melanin                    | 100%       |
| Cluster29 | 7,657,838 | 7,821,877 | T3PKS, NRPS, NRPS-like                             | herboxidiene               | 11%        |
| Cluster30 | 7,872,061 | 7,924,327 | T1PKS, NRPS                                        | kanamycin                  | 2%         |

**Table S2.** Deduced functions of *orfs* in the *mry* BGC

| <i>orfs</i>  | Size (aa) | Proposed function                                         | ID/SI   | Protein<br>homologue | origin                              |
|--------------|-----------|-----------------------------------------------------------|---------|----------------------|-------------------------------------|
| <i>mry1</i>  | 543       | MFS transporter                                           | 99/100  | WP_260821961.1       | <i>Streptomyces</i> sp. CS-7        |
| <i>mry2</i>  | 158       | nuclear transport factor 2 family protein                 | 100/100 | WP_260821960.1       | <i>Streptomyces</i> sp. CS-7        |
| <i>mry3</i>  | 266       | 4'-phosphopantetheinyl transferase<br>superfamily protein | 99/100  | WP_260821958.1       | <i>Streptomyces</i> sp. CS-7        |
| <i>mry4</i>  | 295       | alpha/beta hydrolase                                      | 99/100  | WP_260821956.1       | <i>Streptomyces</i> sp. CS-7        |
| <i>mry5</i>  | 470       | NDP-hexose 2,3-dehydratase family protein                 | 100/100 | WP_260821954.1       | <i>Streptomyces</i> sp. CS-7        |
| <i>mry6</i>  | 253       | class I SAM-dependent methyltransferase                   | 100/100 | WP_260821952.1       | <i>Streptomyces</i> sp. CS-7        |
| <i>mry7</i>  | 373       | aminotransferase                                          | 99/99   | WP_086672685.1       | <i>Streptomyces</i> sp.<br>TSRI0445 |
| <i>mry8</i>  | 504       | FAD-dependent monooxygenase                               | 99/99   | WP_260821949.1       | <i>Streptomyces</i> sp. CS-7        |
| <i>mry9</i>  | 331       | dTDP-glucose 4,6-dehydratase                              | 98/99   | NED04942.1           | <i>Streptomyces</i> sp.<br>SID6648  |
| <i>mry10</i> | 288       | glucose-1-phosphate thymidyltransferase<br>RfbA           | 98/99   | NED04943.1           | <i>Streptomyces</i> sp.<br>SID6648  |
| <i>mry11</i> | 536       | FAD-dependent monooxygenase                               | 99/100  | WP_260821947.1       | <i>Streptomyces</i> sp. CS-7        |
| <i>mry12</i> | 313       | aromatase/cyclase                                         | 99/100  | WP_260821945.1       | <i>Streptomyces</i> sp. CS-7        |
| <i>mry13</i> | 262       | 3-oxoacyl-ACP reductase                                   | 98/100  | AVO00812.1           | <i>Streptomyces</i> sp.             |
| <i>mry14</i> | 117       | acyl carrier protein                                      | 98/98   | AVO00813.1           | <i>Streptomyces</i> sp.             |
| <i>mry15</i> | 404       | ketosynthase chain-length factor                          | 99/99   | WP_260821940.1       | <i>Streptomyces</i> sp. CS-7        |
| <i>mry16</i> | 423       | beta-ketoacyl-[acyl-carrier-protein] synthase             | 99/99   | WP_073774800.1       | <i>Streptomyces</i> sp. CS-7        |
| <i>mry17</i> | 109       | TcmI family type II polyketide cyclase                    | 99/100  | WP_073774798.1       | <i>Streptomyces</i> sp. CS-7        |
| <i>mry18</i> | 224       | response regulator transcription factor                   | 97/98   | AVO00817.1           | <i>Streptomyces</i> sp.             |
| <i>mry19</i> | 235       | monooxygenase                                             | 45/60   | MBT2507467.1         | <i>Streptomyces</i> sp. ISL-98      |
| <i>mry20</i> | 159       | hypothetical protein                                      | 97/98   | WP_086670719.1       | <i>Streptomyces</i> sp.             |
| <i>mry21</i> | 379       | glycosyltransferase                                       | 100/100 | WP_260821935.1       | <i>Streptomyces</i> sp. CS-7        |
| <i>mry22</i> | 308       | NAD-dependent epimerase/dehydratase                       | 100/100 | WP_260821933.1       | <i>Streptomyces</i> sp. CS-7        |

**Table S3.** Deduced functions of *orfs* in the *spn* BGC

| <i>orfs</i>  | Size | Proposed function                                                       | ID/SI   | Protein<br>homologue | origin                           |
|--------------|------|-------------------------------------------------------------------------|---------|----------------------|----------------------------------|
| <i>spn1</i>  | 329  | cytochrome d ubiquinol oxidase subunit II                               | 99/100  | WP_073774786.1       | <i>Streptomyces</i>              |
| <i>spn2</i>  | 439  | cytochrome ubiquinol oxidase subunit I                                  | 99/99   | WP_260821929.1       | <i>Streptomyces</i> sp. CS-7     |
| <i>spn3</i>  | 293  | LysR substrate-binding domain-containing<br>protein                     | 100/100 | WP_073774781.1       | <i>Streptomyces</i>              |
| <i>spn4</i>  | 598  | fatty acyl-AMP ligase                                                   | 100/100 | WP_260821926.1       | <i>Streptomyces</i> sp. CS-7     |
| <i>spn5</i>  | 416  | crotonyl-CoA carboxylase/reductase                                      | 100/100 | WP_260821924.1       | <i>Streptomyces</i> sp. CS-7     |
| <i>spn6</i>  | 800  | type I PKs                                                              | 100/100 | WP_260821922.1       | <i>Streptomyces</i> sp. CS-7     |
| <i>spn7</i>  | 351  | aldo/keto reductase                                                     | 100/100 | WP_260821920.1       | <i>Streptomyces</i> sp. CS-7     |
| <i>spn8</i>  | 264  | alpha/beta fold hydrolase                                               | 97/97   | WP_086670711.1       | <i>Streptomyces</i>              |
| <i>spn9</i>  | 913  | type I PKs                                                              | 99/100  | WP_260821917.1       | <i>Streptomyces</i> sp. CS-7     |
| <i>spn10</i> | 109  | phosphopantetheine-binding protein                                      | 100/100 | WP_073774770.1       | <i>Streptomyces</i>              |
| <i>spn11</i> | 477  | aldehyde dehydrogenase family protein                                   | 100/100 | WP_260821914.1       | <i>Streptomyces</i> sp. CS-7     |
| <i>spn12</i> | 365  | phenazine antibiotic biosynthesis protein                               | 98/99   | WP_079198636.1       | <i>Streptomyces</i>              |
| <i>spn13</i> | 110  | hypothetical protein                                                    | 96/99   | WP_181852409.1       | <i>Streptomyces</i>              |
| <i>spn14</i> | 455  | FAD-binding protein                                                     | 99/99   | WP_260821909.1       | <i>Streptomyces</i> sp. CS-7     |
| <i>spn15</i> | 545  | amino acid adenylation domain-containing<br>protein                     | 99/99   | WP_260821907.1       | <i>Streptomyces</i> sp. CS-7     |
| <i>spn16</i> | 220  | phenazine biosynthesis FMN-dependent oxidase<br>(PhzG)                  | 99/100  | WP_260821905.1       | <i>Streptomyces</i> sp. CS-7     |
| <i>spn17</i> | 283  | phenazine biosynthesis isomerase (PhzF)                                 | 99/99   | WP_086670700.1       | <i>Streptomyces albobinaceus</i> |
| <i>spn18</i> | 627  | anthranilate synthase family protein (PhzE)                             | 99/100  | WP_260821902.1       | <i>Streptomyces</i> sp. CS-7     |
| <i>spn19</i> | 207  | isochorismatase family protein (PhzD)                                   | 99/99   | WP_073774760.1       | <i>Streptomyces</i>              |
| <i>spn20</i> | 391  | Phospho-2-dehydro-3-deoxyheptonate<br>aldolase (DAHP synthetase) (PhzC) | 99/99   | WP_260821899.1       | <i>Streptomyces</i> sp. CS-7     |
| <i>spn21</i> | 166  | PhzA/PhzB family protein                                                | 98/98   | WP_073774756.1       | <i>Streptomyces</i>              |
| <i>spn22</i> | 344  | ketoacyl-ACP synthase III family protein (FabH)                         | 99/99   | WP_073774754.1       | <i>Streptomyces</i>              |
| <i>spn23</i> | 97   | phosphopantetheine-binding protein                                      | 100/100 | WP_260821896.1       | <i>Streptomyces</i> sp. CS-7     |
| <i>spn24</i> | 846  | LuxR family transcriptional regulator                                   | 99/99   | WP_260821894.1       | <i>Streptomyces</i> sp. CNB091   |
| <i>spn25</i> | 289  | methyltransferase                                                       | 99/97   | WP_018960036.1       | <i>Streptomyces</i> sp. CNB091   |
| <i>spn26</i> | 516  | MFS_transporter                                                         | 99/100  | WP_018960037.1       | <i>Streptomyces</i> sp. CNB091   |
| <i>spn27</i> | 781  | FAD-dependent oxidoreductase                                            | 97/100  | WP_018960038.1       | <i>Streptomyces</i> sp. CNB091   |
| <i>spn28</i> | 209  | TetR/AcrR_family_transcriptional_regulator                              | 97/99   | WP_018960039.1       | <i>Streptomyces</i> sp. CNB091   |

**Table S4.** Deduced functions of *orfs* in the *din* BGC

| <i>orfs</i>  | Size | Proposed function                          | ID/SI | Protein<br>homologue | origin                                                         |
|--------------|------|--------------------------------------------|-------|----------------------|----------------------------------------------------------------|
| <i>dyn1</i>  | 349  | nonC                                       | 89/93 | AAD37456.1           | <i>Streptomyces griseus</i> subsp. <i>griseus</i><br>DSM 40695 |
| <i>dyn2</i>  | 175  | nonB                                       | 89/92 | AAD37455.1           | <i>Streptomyces griseus</i> subsp. <i>griseus</i><br>DSM 40695 |
| <i>dyn3</i>  | 279  | tetranactin resistance protein (nonR)      | 89/93 | AAD37454.1           | <i>Streptomyces griseus</i> subsp. <i>griseus</i><br>DSM 40695 |
| <i>dyn4</i>  | 297  | enoyl-CoA hydratase homolog (nonS)         | 93/94 | AAC26135.1           | <i>Streptomyces griseus</i> subsp. <i>griseus</i><br>DSM 40695 |
| <i>dyn5</i>  | 555  | putative nonactic acid:CoASH ligase (nonL) | 89/92 | AAC26134.1           | <i>Streptomyces griseus</i> subsp. <i>griseus</i><br>DSM 40695 |
| <i>dyn6</i>  | 569  | putative diester hydrolase (nonD)          | 89/93 | AAC26133.1           | <i>Streptomyces griseus</i> subsp. <i>griseus</i><br>DSM 40695 |
| <i>dyn7</i>  | 271  | putative ketoacyl reductase (nonE)         | 93/94 | AAD37453.1           | <i>Streptomyces griseus</i> subsp. <i>griseus</i><br>DSM 40695 |
| <i>dyn8</i>  | 520  | putative ketoacyl reductase (nonM)         | 83/88 | AAD37452.1           | <i>Streptomyces griseus</i> subsp. <i>griseus</i><br>DSM 40695 |
| <i>dyn9</i>  | 427  | ketoacyl synthase II homolog (nonJ)        | 93/95 | AAD37451.1           | <i>Streptomyces griseus</i> subsp. <i>griseus</i><br>DSM 40695 |
| <i>dyn10</i> | 462  | ketoacyl synthase I homolog (nonK)         | 92/95 | AAD37450.1           | <i>Streptomyces griseus</i> subsp. <i>griseus</i><br>DSM 40695 |

**Table S5.** Summary of  $^1\text{H}$  and  $^{13}\text{C}$  NMR data for compounds **1-2** ( $\delta$  in ppm)

| position             | Compound 1                |                                  | Compound 2               |                                  |
|----------------------|---------------------------|----------------------------------|--------------------------|----------------------------------|
|                      | $\delta_{\text{C}}$ mult  | $\delta_{\text{H}}$ ( $J$ in Hz) | $\delta_{\text{C}}$ mult | $\delta_{\text{H}}$ ( $J$ in Hz) |
|                      | $\text{CDCl}_3$ , 126 MHz | $\text{CDCl}_3$ , 500 MHz        | MeOD, 176 MHz,           | MeOD, 700 MHz                    |
| 1                    | 154.0, C                  |                                  | 156.5, C                 |                                  |
| 2                    | 118.6, CH                 | 6.97, s                          | 114.9, CH                | 6.67, s                          |
| 3                    | 142.5, C                  |                                  | 143.5, C                 |                                  |
| 3-CH <sub>3</sub>    | 22.3, CH <sub>3</sub>     | 2.49, s                          | 22.7, CH <sub>3</sub>    | 2.42, s                          |
| 4                    | 118.1, CH                 | 8.16, s                          | 117.5, CH                | 7.97, s                          |
| 4a                   | 138.9, C                  |                                  | 139.9, C                 |                                  |
| 5                    | 130.0, C                  |                                  | 126.7, C                 |                                  |
| 6                    | 153.7, C                  |                                  | 154.5, C                 |                                  |
| 6a                   | 133.3, C                  |                                  | 138.9, C                 |                                  |
| 7                    | 193.3, C                  |                                  | 194.3, C                 |                                  |
| 7a                   | 114.7, C                  |                                  | 116.3, C                 |                                  |
| 8                    | 161.9, C                  |                                  | 162.8, C                 |                                  |
| 9                    | 125.2, CH                 | 7.34, d, $J$ = 8.3 Hz            | 124.8, CH                | 7.21, d, $J$ = 8.1 Hz            |
| 10                   | 137.9, CH                 | 7.73, t, $J$ = 8.0 Hz            | 138.4, CH                | 7.51, t, $J$ = 7.1 Hz            |
| 11                   | 121.4, CH                 | 7.86, t, $J$ = 7.3 Hz            | 120.4, CH                | 7.66, t, $J$ = 7.8 Hz            |
| 11a                  | 135.1, C                  |                                  | 137.7, C                 |                                  |
| 12                   | 189.2, C                  |                                  | 188.0, C                 |                                  |
| 12a                  | 118.7, C                  |                                  | 119.4, C                 |                                  |
| 12b                  | 118.5, C                  |                                  | 117.8, C                 |                                  |
| 1'                   | 71.7, CH                  | 5.73, d, $J$ = 10.0 Hz           | 72.2, CH                 | 5.67, d, $J$ = 11.6 Hz           |
| 2'a                  | 31.7, CH <sub>2</sub>     | 2.31, d, $J$ = 13.7 Hz           | 34.9, CH <sub>2</sub>    | 2.22, d, $J$ = 12.8 Hz           |
| 2'b                  | 31.7, CH <sub>2</sub>     | 2.55, d, $J$ = 12.3 Hz           | 34.9, CH <sub>2</sub>    | 2.50, q, $J$ = 11.8 Hz           |
| 3'                   | 62.2, CH                  | 3.35, t, $J$ = 13.1 Hz           | 55.6, CH                 | 3.44, d, $J$ = 11.2 Hz           |
| 3'-N-CH <sub>3</sub> | 30.5, CH <sub>3</sub>     | 2.71, s                          |                          |                                  |
| 4'                   | 72.9, CH                  | 3.75, d, $J$ = 9.3 Hz            | 74.7, CH                 | 3.56, m                          |
| 5'                   | 77.9, CH                  | 3.67, p, $J$ = 6.0 Hz            | 79.3, CH                 | 3.46, d, $J$ = 9.7 Hz            |
| 5'-CH <sub>3</sub>   | 18.4, CH <sub>3</sub>     | 1.52, s                          | 18.6, CH <sub>3</sub>    | 1.44, d, $J$ = 6.0 Hz            |

## Summary of NMR data and HRESI-MS data for compounds 3-6

The HRESI-MS data of compound **3** showed  $[M+H]^+=339.0858$ ,  $[M+Na]^+=361.0690$ , the molecular formula of **3** was established as  $C_{19}H_{14}O_6$ ,  $^1H$  NMR ( $CDCl_3$ , 700 MHz)  $\delta$  12.28 (s, 1H), 11.64 (s, 1H), 7.68-7.62 (m, 2H), 7.26 (d,  $J = 8.0$  Hz, 1H), 6.99 (s, 1H), 3.44 (s, 1H), 3.08 (s, 2H), 3.01 (d,  $J = 15.0$  Hz, 1H), 2.97 (d,  $J = 15.0$  Hz, 1H), 1.49 (s, 3H);  $^{13}C$  NMR (176 MHz,  $CDCl_3$ )  $\delta$  196.9, 193.0, 183.2, 163.7, 162.0, 150.7, 138.0, 137.8, 135.4, 128.9, 124.0, 122.0, 119.5, 117.5, 115.0, 72.8, 53.8, 45.7, 30.0. The structure of compound **3** was elucidated by comparing the data with previous literature, they were identified as rebelomycin (**3**).

The HRESI-MS data of compound **4** showed  $[M+H]^+=425.2066$ ,  $[M+Na]^+=447.1883$ , the molecular formula of **4** was established as  $C_{24}H_{28}N_2O_5$ ,  $^1H$  NMR (500 MHz,  $CDCl_3$ )  $\delta$  8.35 (dd,  $J = 8.7, 1.1$  Hz, 1H), 7.87 (dd,  $J = 8.6, 7.0$  Hz, 1H), 7.80 (dd,  $J = 8.6, 7.0$  Hz, 1H), 7.74 (d,  $J = 6.6$  Hz, 1H), 5.45 (t,  $J = 7.8$  Hz, 1H), 5.38 (d,  $J = 8.4$  Hz, 1H).  $^{13}C$  NMR (126 MHz,  $CDCl_3$ )  $\delta$  175.3, 166.9, 144.2, 141.5, 140.8, 140.6, 138.4, 133.2, 132.3, 131.5, 130.5, 130.1, 129.7, 129.5, 75.6, 53.5, 52.8, 51.4, 31.6, 29.2, 28.6, 27.6, 22.6, 14.0. The structure of compound **3** was elucidated by comparing the data with previous literature, they were identified as streptophenazine O (**4**).

The HRESI-MS data of compound **5** showed  $[M+H]^+=439.2226$ ,  $[M+Na]^+=461.2038$ , the molecular formula of **5** was established as  $C_{25}H_{30}N_2O_5$ ,  $^1H$  NMR (500 MHz,  $CDCl_3$ )  $\delta$  8.39 (dd,  $J = 8.7, 1.5$  Hz, 1H), 8.29 (m, 1H), 8.27 (d,  $J = 1.5$  Hz, 1H), 7.91 (dd,  $J = 8.7, 6.9$  Hz, 1H), 7.83 (dd,  $J = 8.7, 6.8$  Hz, 1H), 7.78 (d,  $J = 5.5$  Hz, 1H), 5.48 (d,  $J = 7.6$  Hz, 1H), 4.95 (s, 1H), 4.14 (s, 3H), 4.01 (s, 1H), 3.89 (s, 3H), 1.58 (s, 2H), 1.57 (s, 2H), 1.55 (s, 1H), 1.28 (s, 4H), 0.85 (d,  $J = 2.6$  Hz, 3H), 0.84 (d,  $J = 2.6$  Hz, 3H).  $^{13}C$  NMR (126 MHz,  $CDCl_3$ )  $\delta$  175.3, 166.9, 144.2, 141.5, 140.8, 138.4, 133.1, 132.3, 131.5, 130.5, 130.1, 129.7, 129.5, 128.1, 75.6, 53.5, 52.8, 51.4, 38.7, 28.6, 27.9, 27.9, 27.3, 22.6, 22.5. The structure of compound **5** was elucidated by comparing the data with previous literature, they were identified as streptophenazine M (**5**).

The HRESI-MS data of compound **6** showed  $[M+H]^+=383.2424$ , the molecular formula of **6** was established as  $C_{21}H_{24}O_6$ ,  $^1H$  NMR (500 MHz,  $CDCl_3$ )  $\delta$  5.02 (m, 1H), 4.05 (q,  $J = 7.5$  Hz, 2H), 3.87 (d,  $J = 7.2$  Hz, 2H), 2.54 (d,  $J = 3.8$  Hz, 1H), 2.07-1.89 (m, 1H), 1.85-1.72 (m, 3H), 1.64 (q,  $J = 5.0$  Hz, 1H), 1.61-1.46 (m, 1H), 1.25 (d,  $J = 6.2$  Hz, 3H), 1.11 (t,  $J = 7.3$  Hz, 7H), 0.90 (t,  $J = 7.4$  Hz, 3H).  $^{13}C$  NMR (126 MHz,  $CDCl_3$ )  $\delta$  174.5, 174.2, 80.0, 79.9, 76.4, 76.3, 73.3, 69.1, 45.3, 45.1, 42.3, 39.9, 31.5, 31.4, 28.2, 28.0, 27.4, 20.5, 13.2, 12.6, 9.3. The structure of compound **6** was elucidated by comparing the data with previous literature, they were identified as dimeric dynactin (**6**).

**Table S6.** High resolution MS (HRMS), retention time, and predicted chemical formula for nodes in streptophenazine cluster from GNPS molecular network. (Related to **Figure 3** and **Figure 5**)

| Precursor ion mass from molecular network | Determined m/z | Retention time (min) | Predicted formula                                                          | Predicted Structure                                                                                                  |
|-------------------------------------------|----------------|----------------------|----------------------------------------------------------------------------|----------------------------------------------------------------------------------------------------------------------|
| 383.2                                     | 383.161        | 18.6                 | C <sub>21</sub> H <sub>23</sub> N <sub>2</sub> O <sub>5</sub> <sup>+</sup> | lacked methylene unit from 397.2                                                                                     |
| 397.2                                     | 397.176        | 20.0                 | C <sub>22</sub> H <sub>25</sub> N <sub>2</sub> O <sub>5</sub> <sup>+</sup> | streptophenazine E ( <b>42</b> )                                                                                     |
| 411.2                                     | 411.191        | 21.7                 | C <sub>23</sub> H <sub>27</sub> N <sub>2</sub> O <sub>5</sub> <sup>+</sup> | streptophenazine C ( <b>41</b> )<br>streptophenazine D ( <b>31</b> )<br>streptophenazine P ( <b>40</b> )             |
| 423.2                                     | 423.191        | 24.1                 | C <sub>24</sub> H <sub>27</sub> N <sub>2</sub> O <sub>5</sub> <sup>+</sup> | oxo-streptophenazine A ( <b>45</b> )<br>oxo-streptophenazine B ( <b>46</b> )                                         |
| 425.2                                     | 425.172        | 13.9                 | C <sub>24</sub> H <sub>29</sub> N <sub>2</sub> O <sub>5</sub> <sup>+</sup> | streptophenazine A ( <b>29</b> )<br>streptophenazine B ( <b>30</b> )                                                 |
|                                           | 425.210        | 6.6                  | C <sub>24</sub> H <sub>29</sub> N <sub>2</sub> O <sub>5</sub> <sup>+</sup> | streptophenazine O ( <b>4</b> )                                                                                      |
| 437.2                                     | 437.209        | 26.3                 | C <sub>25</sub> H <sub>29</sub> N <sub>2</sub> O <sub>5</sub> <sup>+</sup> | oxo-streptophenazine G ( <b>24</b> )<br>oxo-streptophenazine F ( <b>25</b> )                                         |
| 439.2                                     | 439.226        | 8.6                  | C <sub>25</sub> H <sub>31</sub> N <sub>2</sub> O <sub>5</sub> <sup>+</sup> | streptophenazine M ( <b>5</b> )                                                                                      |
|                                           | 439.187        | 15.9                 | C <sub>25</sub> H <sub>31</sub> N <sub>2</sub> O <sub>5</sub> <sup>+</sup> | diastereomer at C-2' of streptophenazine G ( <b>49</b> )<br>diastereomer at C-2' of streptophenazine F ( <b>50</b> ) |
|                                           | 439.231        | 0.7                  | C <sub>25</sub> H <sub>31</sub> N <sub>2</sub> O <sub>5</sub> <sup>+</sup> | streptophenazine G ( <b>34</b> )<br>streptophenazine F ( <b>35</b> )                                                 |
| 443.2                                     | 443.164        | 19.5                 |                                                                            |                                                                                                                      |
| 453.2                                     | 453.203        | 11.6                 | C <sub>29</sub> H <sub>33</sub> N <sub>2</sub> O <sub>5</sub> <sup>+</sup> | streptophenazine L ( <b>39</b> )                                                                                     |
|                                           | 453.237        | 26.4                 | C <sub>29</sub> H <sub>33</sub> N <sub>2</sub> O <sub>5</sub> <sup>+</sup> | diastereomer of streptophenazine L                                                                                   |
| 467.2                                     | 467.181        | 14.4                 | C <sub>26</sub> H <sub>31</sub> N <sub>2</sub> O <sub>6</sub> <sup>+</sup> | streptophenazine K ( <b>38</b> )                                                                                     |
|                                           | 467.217        | 21.9                 | C <sub>26</sub> H <sub>31</sub> N <sub>2</sub> O <sub>6</sub> <sup>+</sup> | streptophenazine J ( <b>37</b> )                                                                                     |
| 467.3                                     | 467.254        | 28.0                 | C <sub>26</sub> H <sub>31</sub> N <sub>2</sub> O <sub>6</sub> <sup>+</sup> | diastereomer of streptophenazine K or J                                                                              |
| 481.2                                     | 481.197        | 17.8                 | C <sub>27</sub> H <sub>33</sub> N <sub>2</sub> O <sub>6</sub> <sup>+</sup> | additional methylene unit from 467.2                                                                                 |



**Figure S1.** The whole genome phylogenetic tree of marine-derived SCSIO LCY30

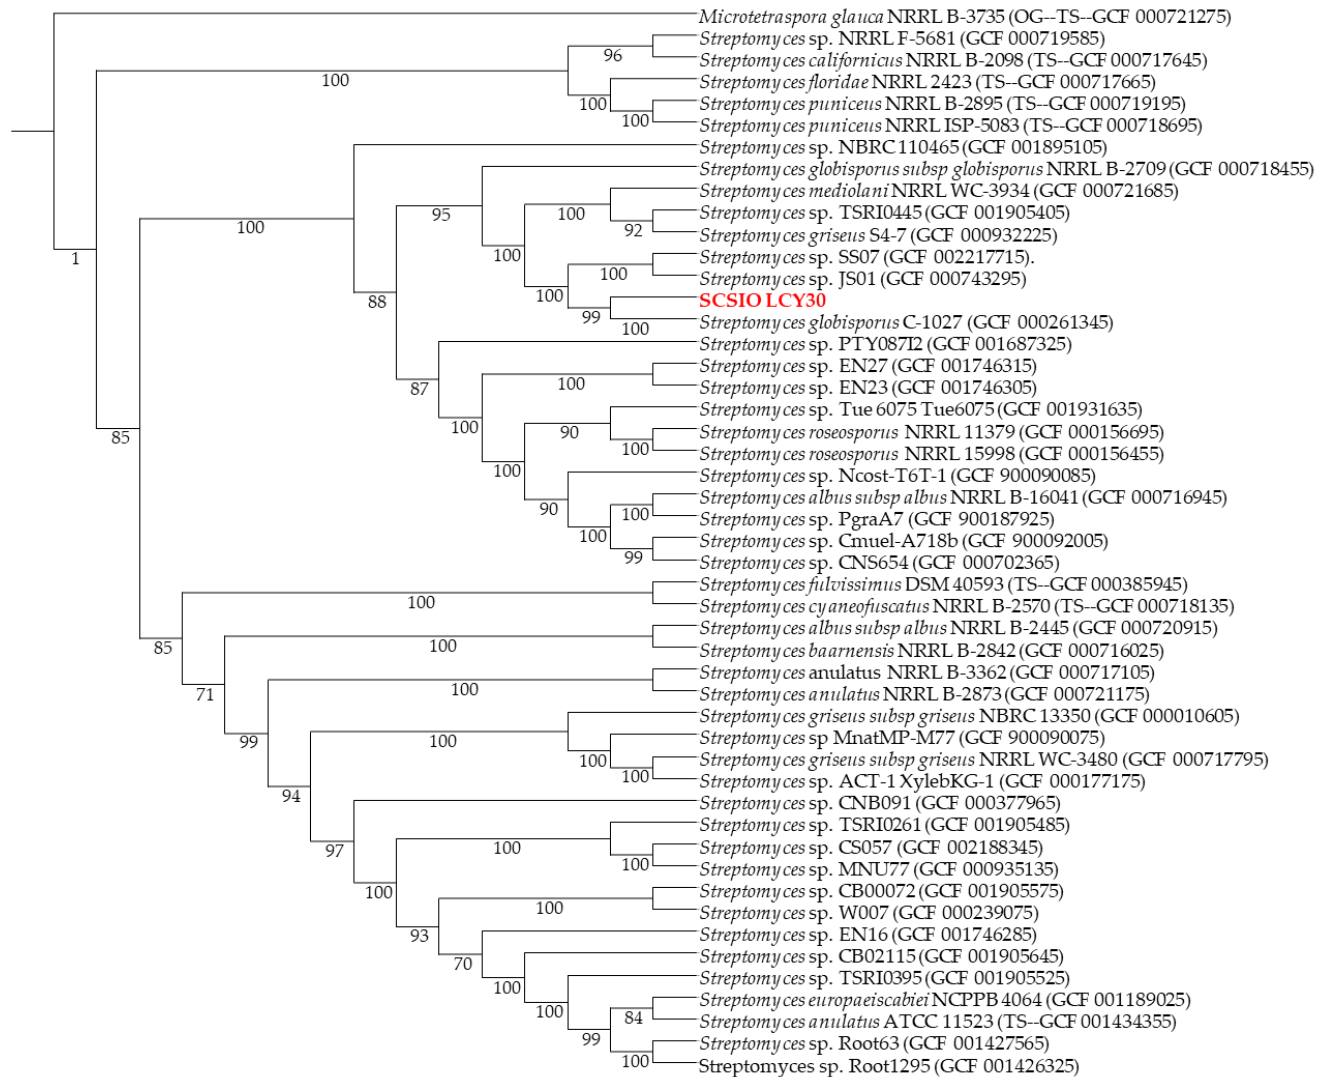

**Figure S2.** Molecular network showing production of streptophenazines, related to **Figure 7**.

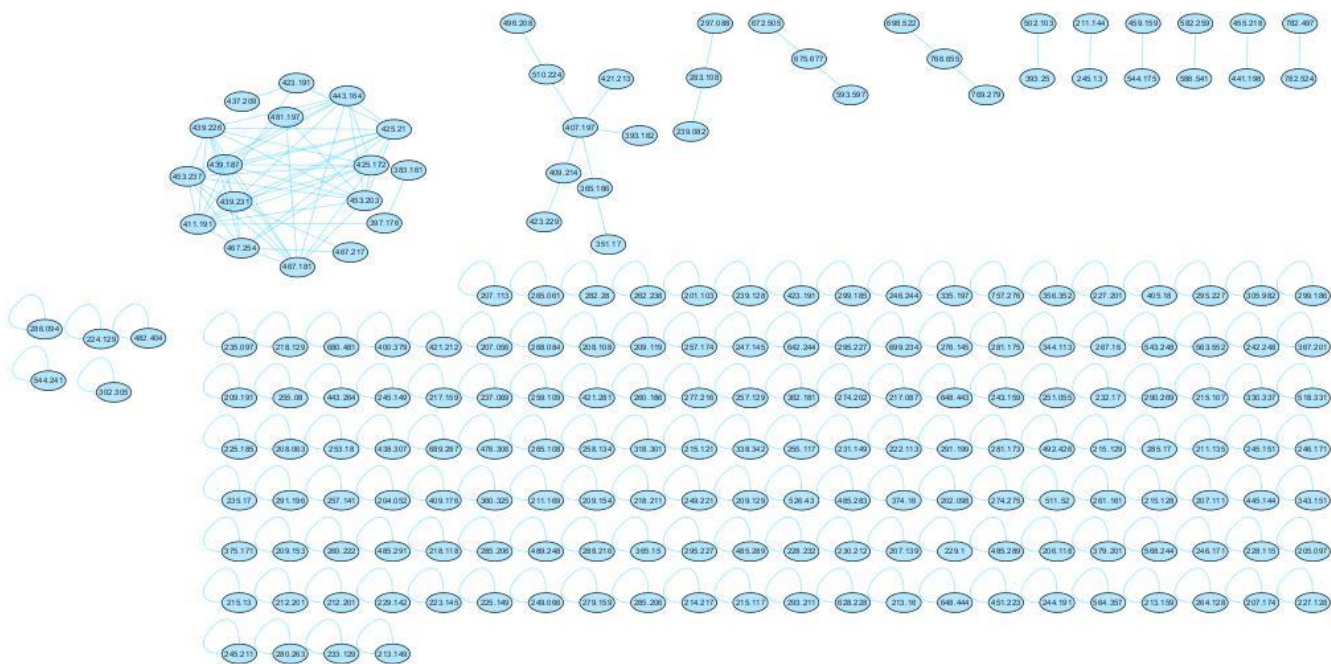

**Figure S3.** Structures of streptophenazines.

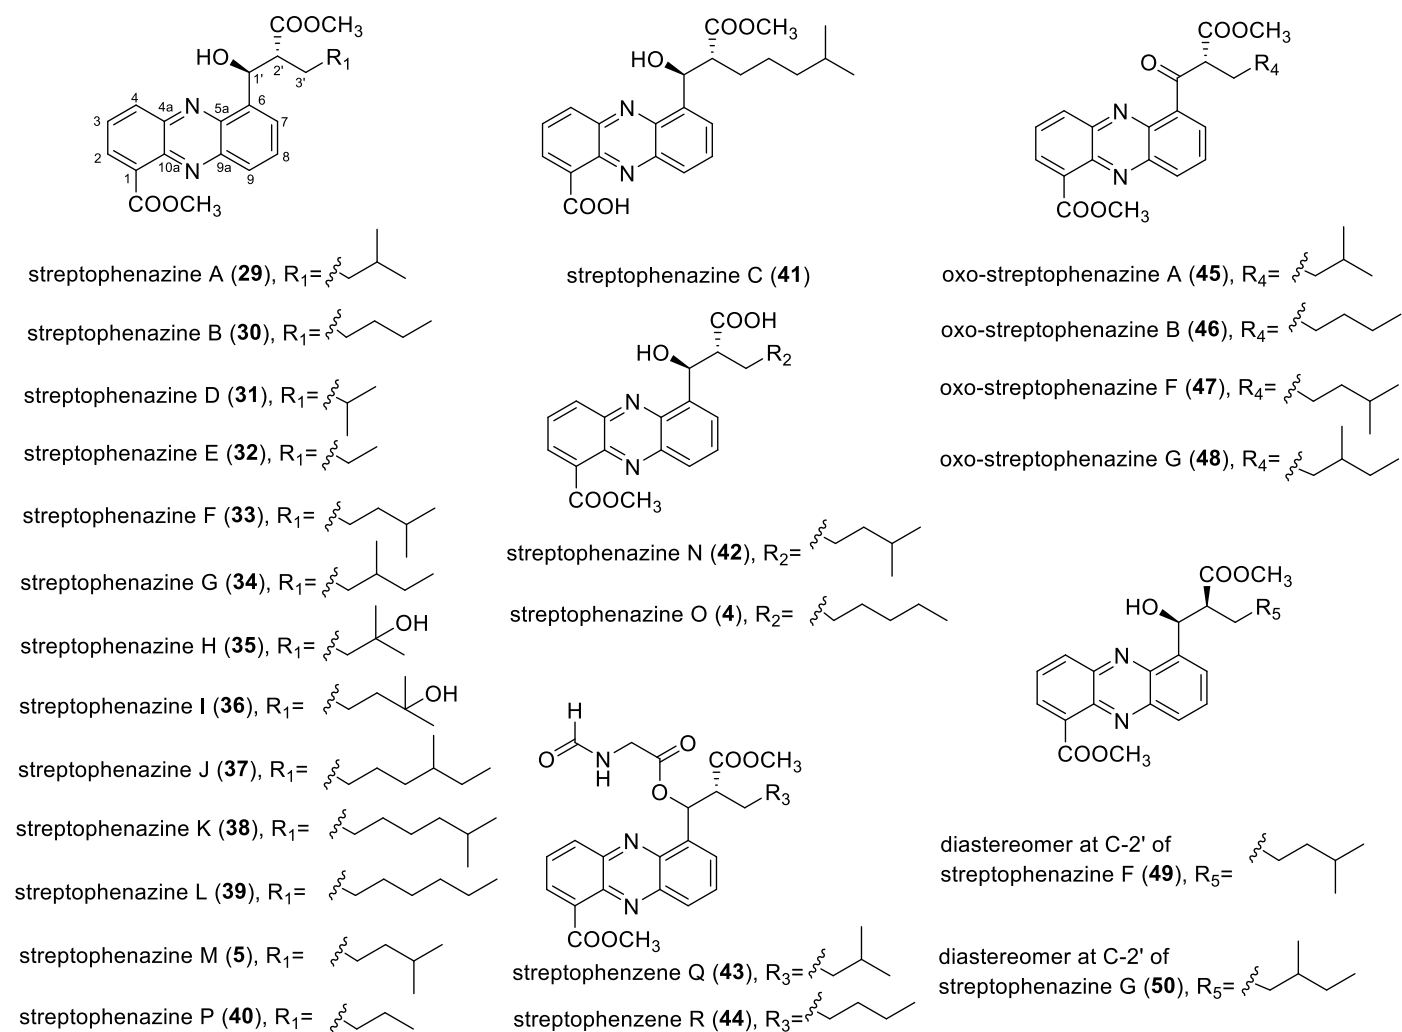

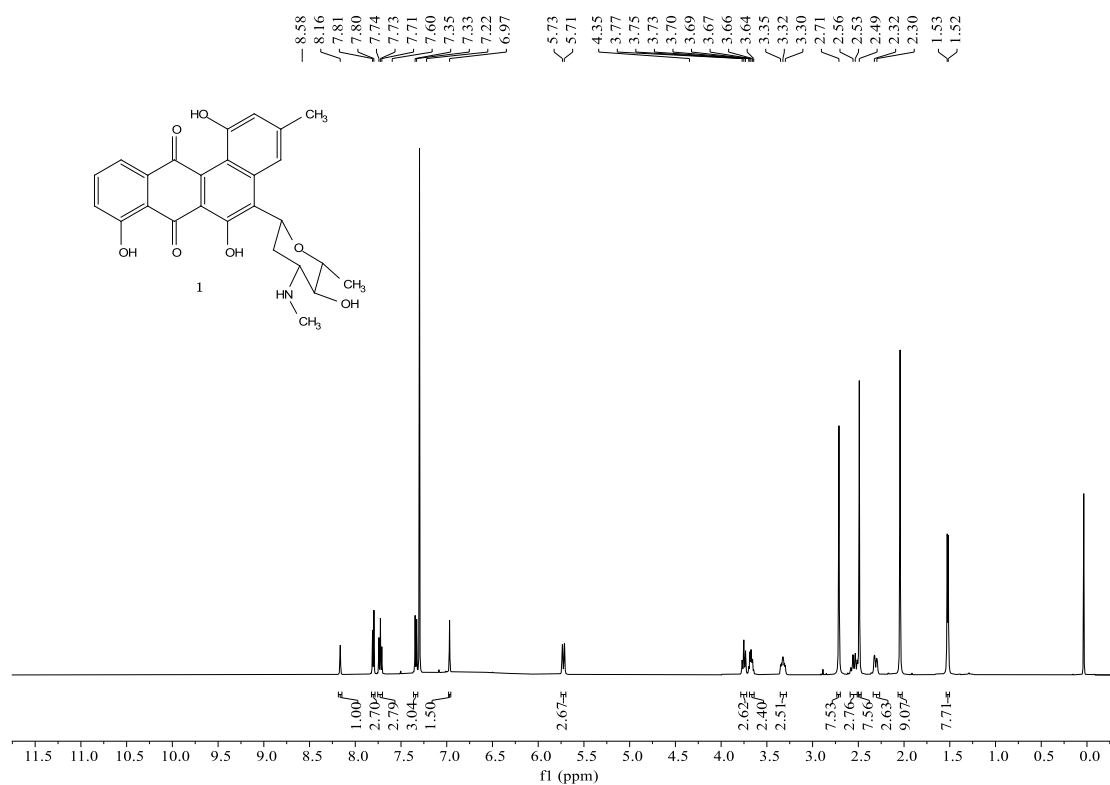

**Figure S4.** <sup>1</sup>H NMR (500 MHz, Chloroform-*d*) spectrum of **1**

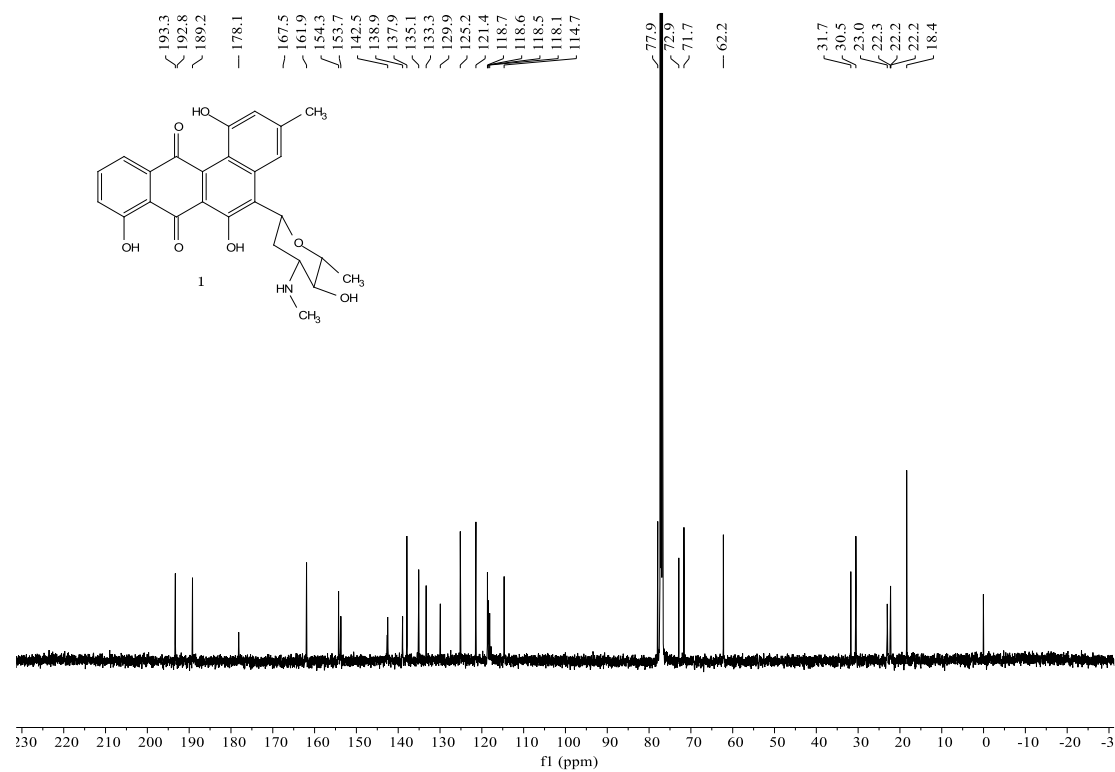

**Figure S5.** <sup>13</sup>C NMR (176 MHz, Chloroform-*d*) spectrum of **1**

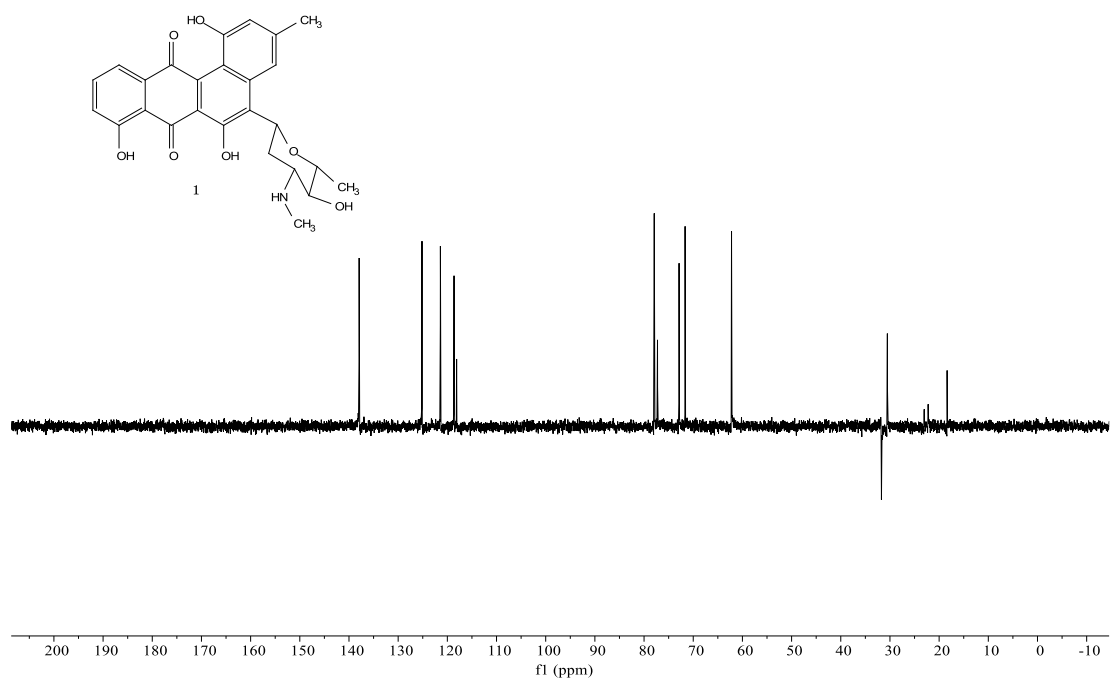

**Figure S6.** DEPT135 spectrum of **1**

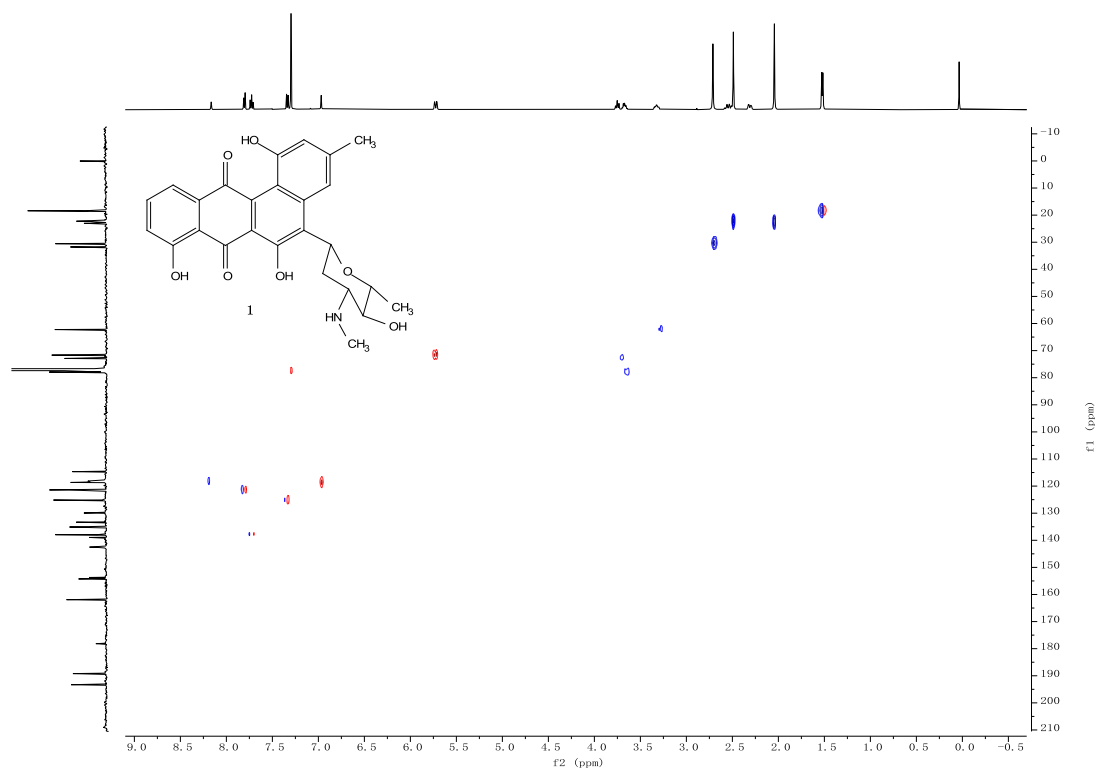

**Figure S7.** HSQC spectrum of **1**

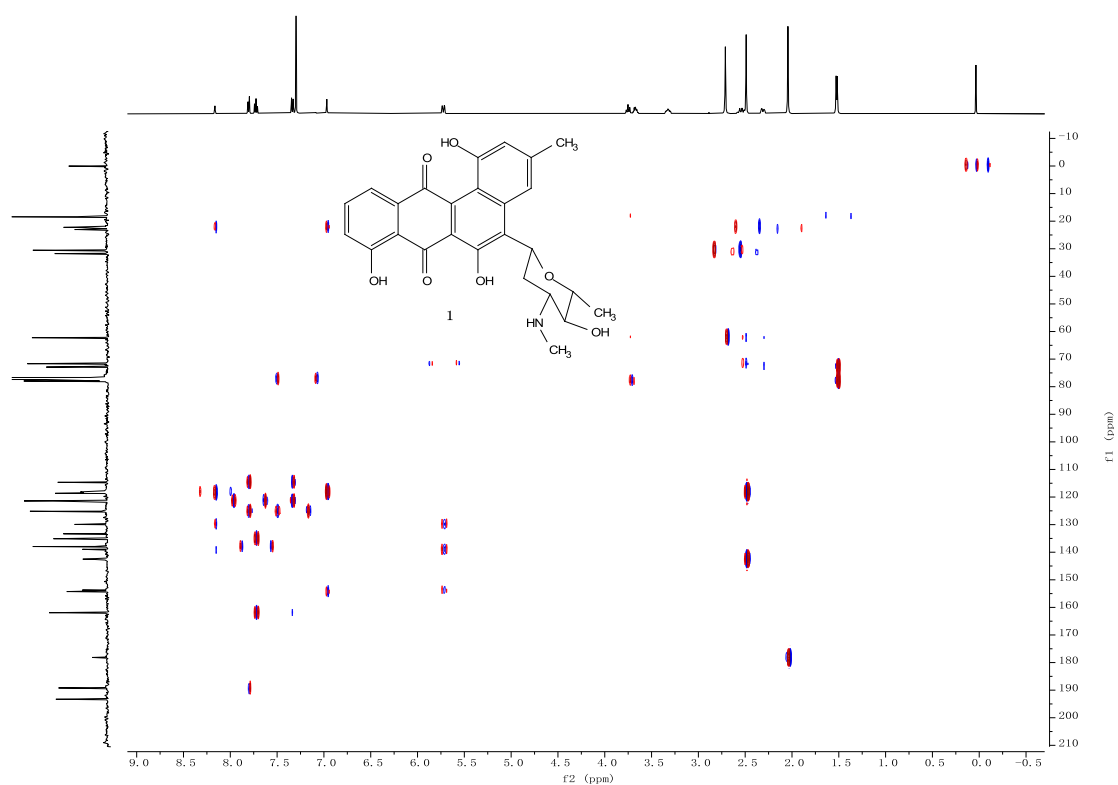

**Figure S8.** HMBC spectrum of **1**

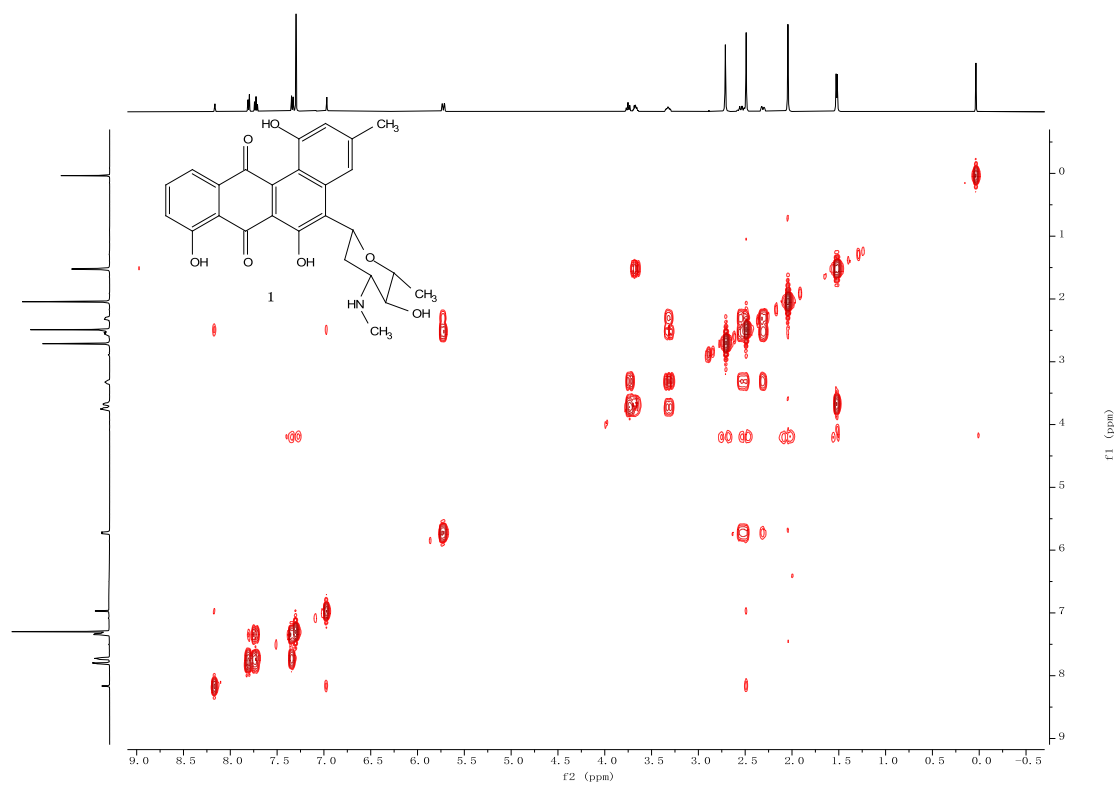

**Figure S9.**  $^1\text{H}$ - $^1\text{H}$  COSY spectrum of **1**

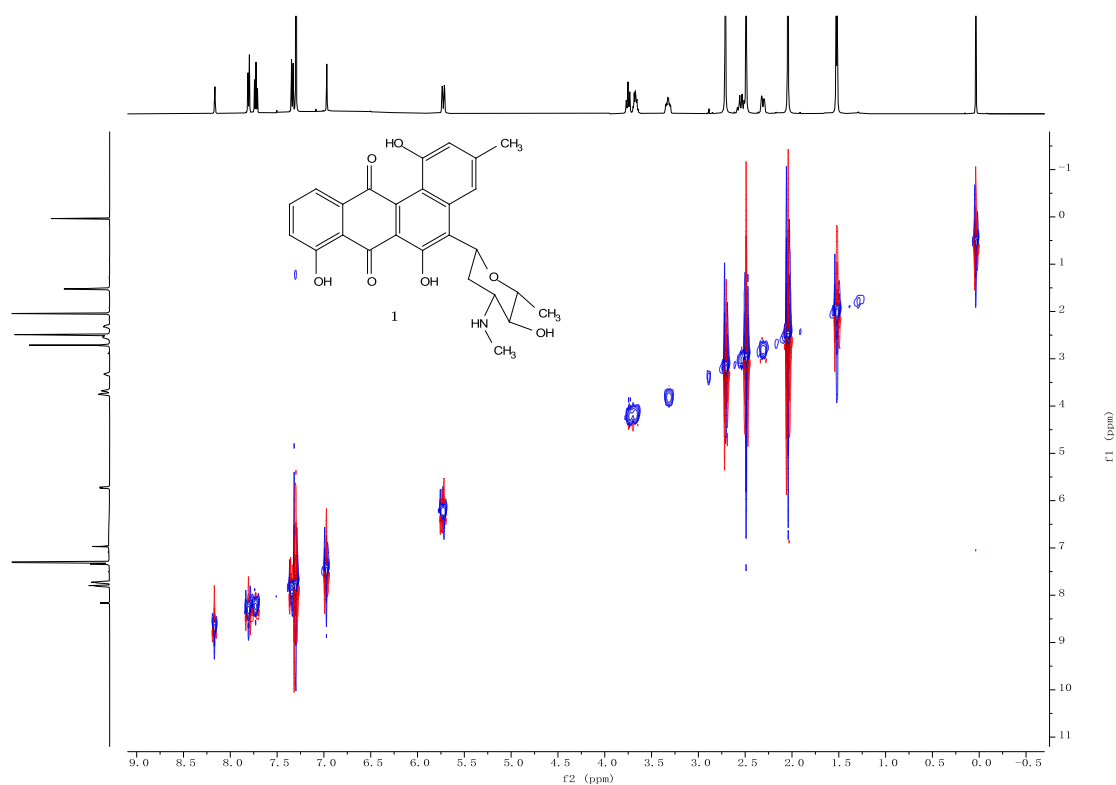

Figure S10. NOESY spectrum of **1**

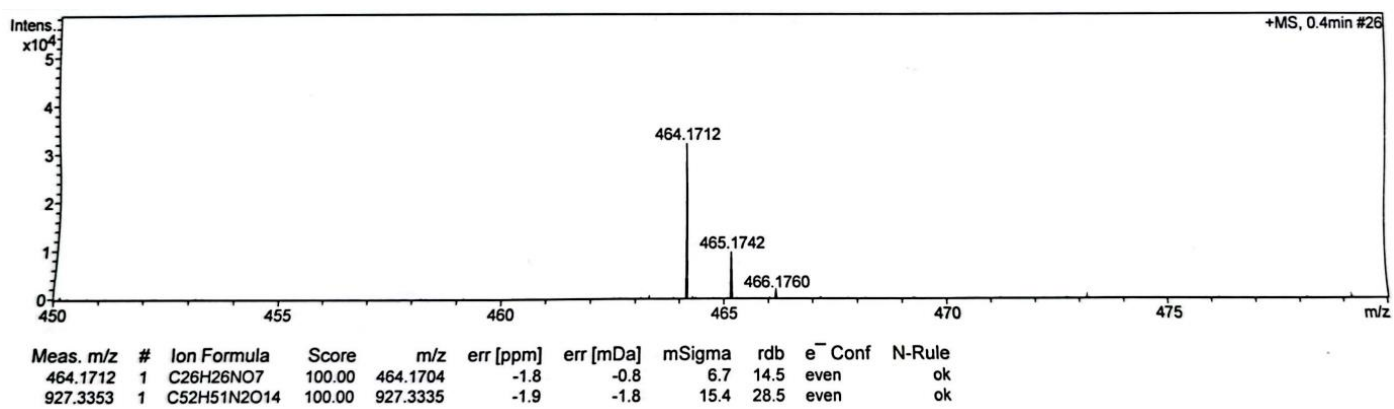

Figure S11. HRESI-MS spectrum of **1**

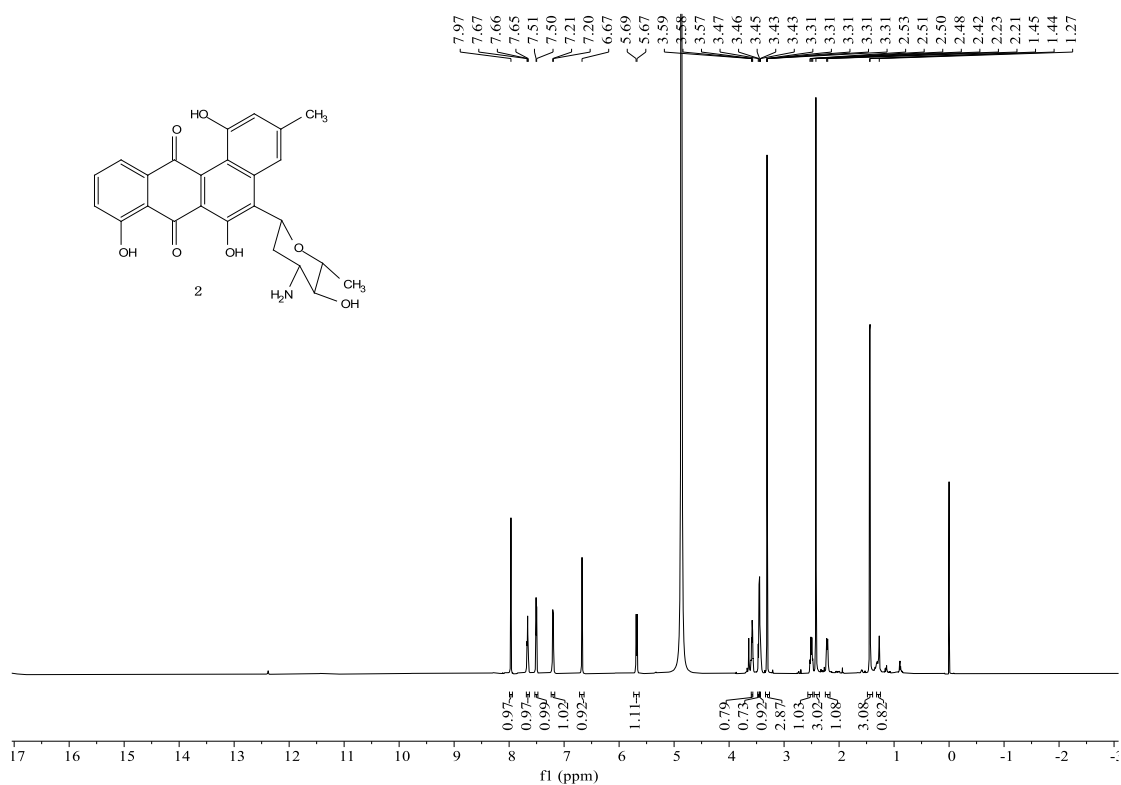

**Figure S12.** <sup>1</sup>H NMR (500 MHz, MeOD) spectrum of **2**

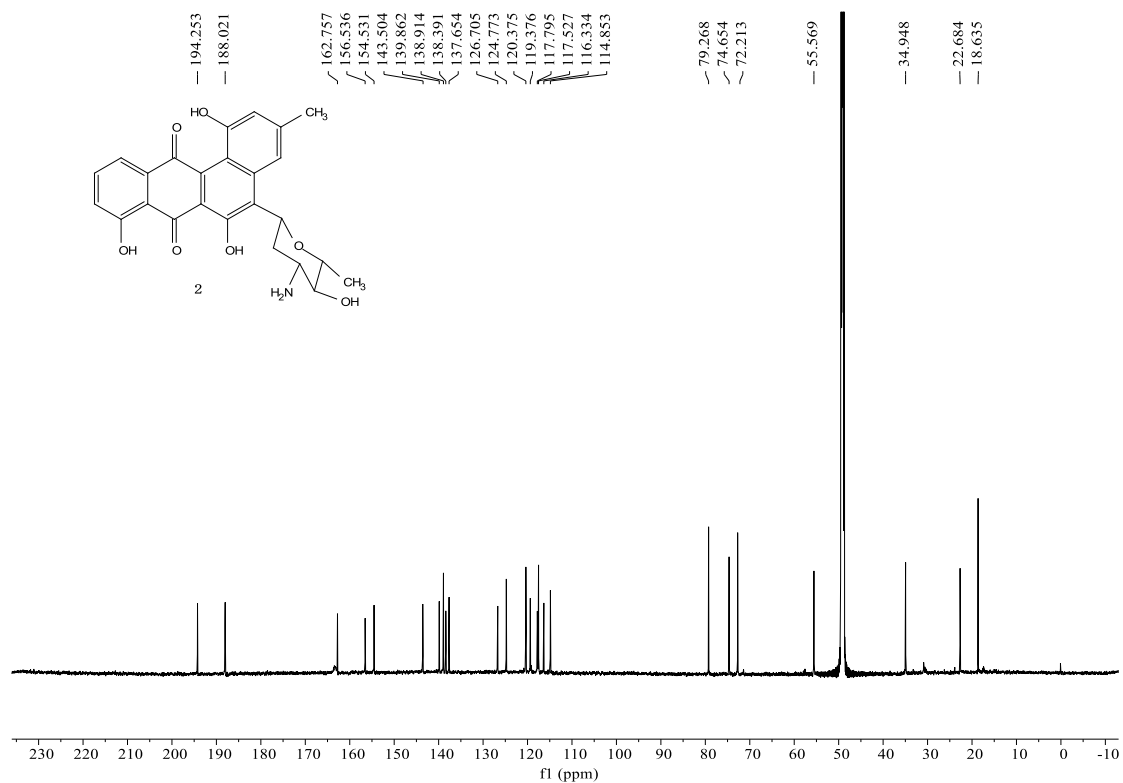

**Figure S13.** <sup>13</sup>C NMR (176 MHz, MeOD) spectrum of **2**



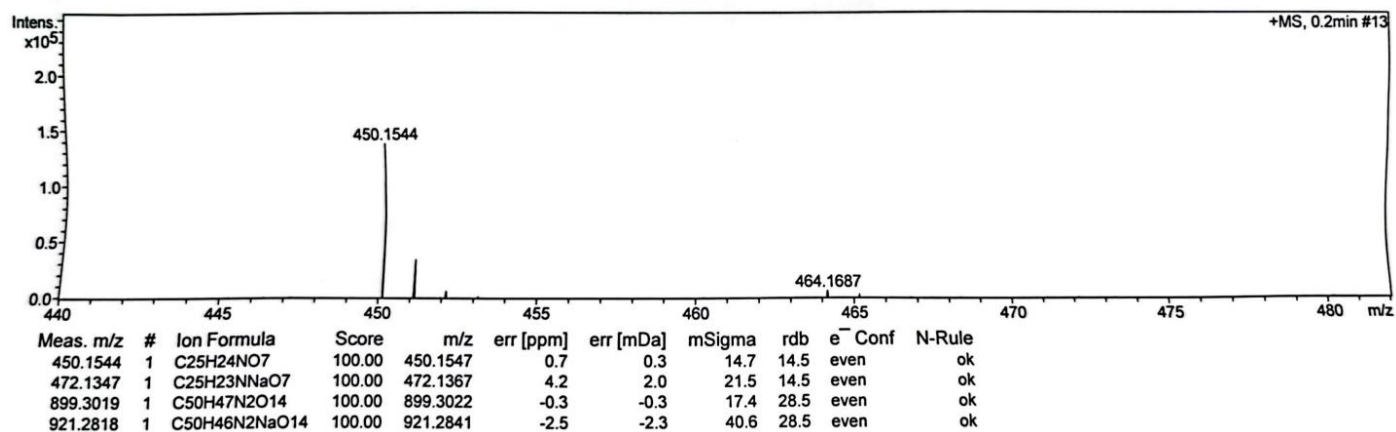

Figure S14. HRESI-MS spectrum of **2**

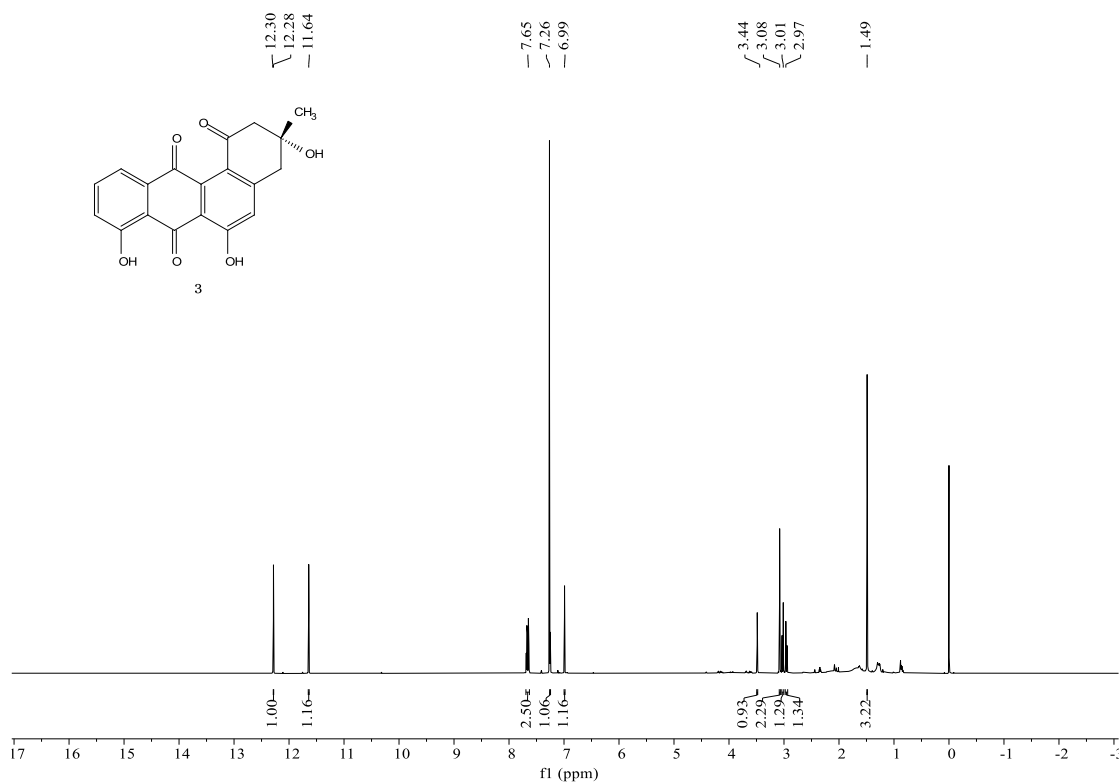

Figure S15. <sup>1</sup>H NMR (700 MHz, Chloroform-*d*) spectrum of **3**

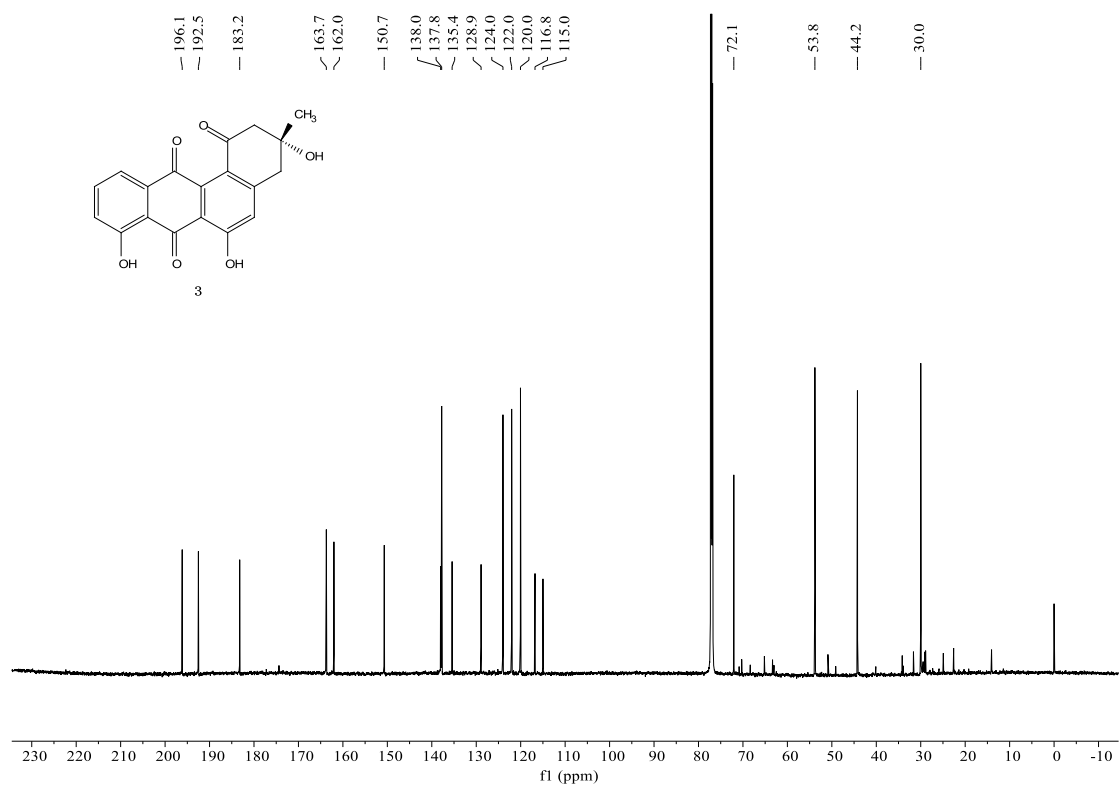

**Figure S16.**  $^{13}\text{C}$  NMR (176MHz, Chloroform-*d*) spectrum of **3**

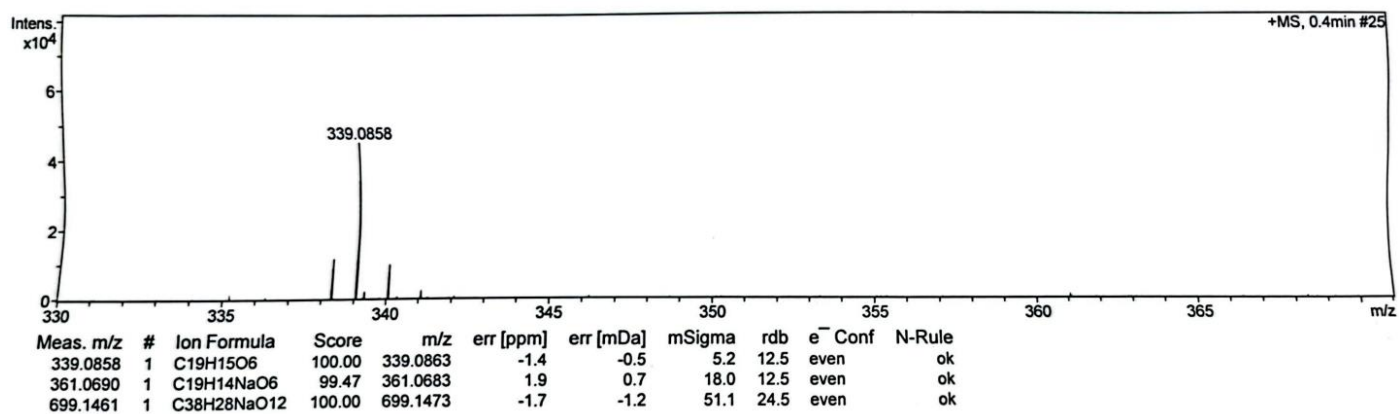

**Figure S17.** HRESI-MS spectrum of **3**

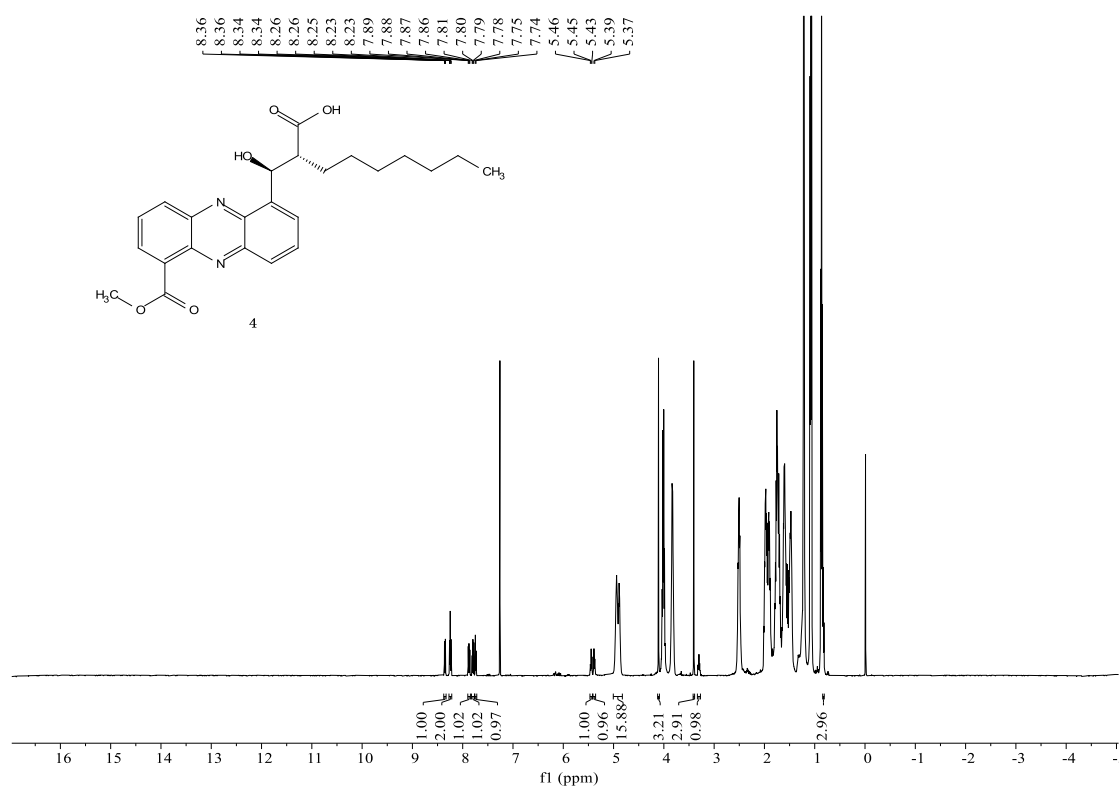

**Figure S18.** <sup>1</sup>H NMR (700 MHz, Chloroform-*d*) spectrum of **4**

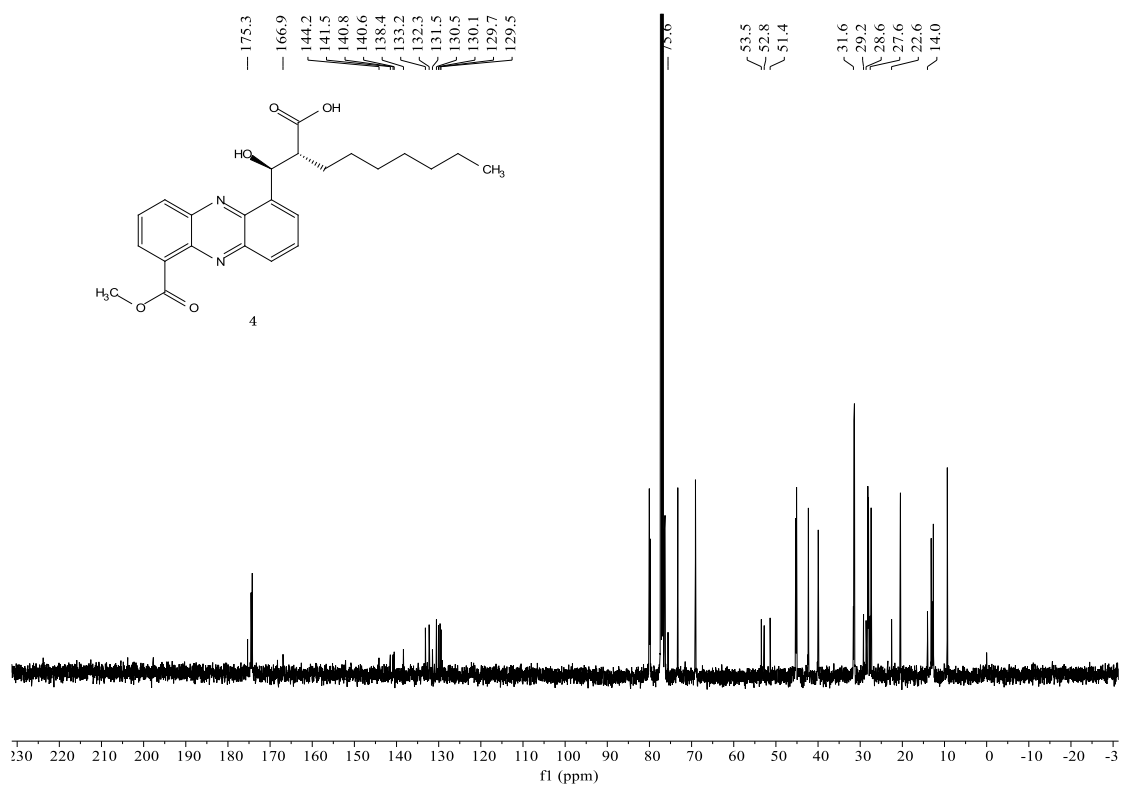

**Figure S19.** <sup>13</sup>C NMR (176 MHz, Chloroform-*d*) spectrum of **4**

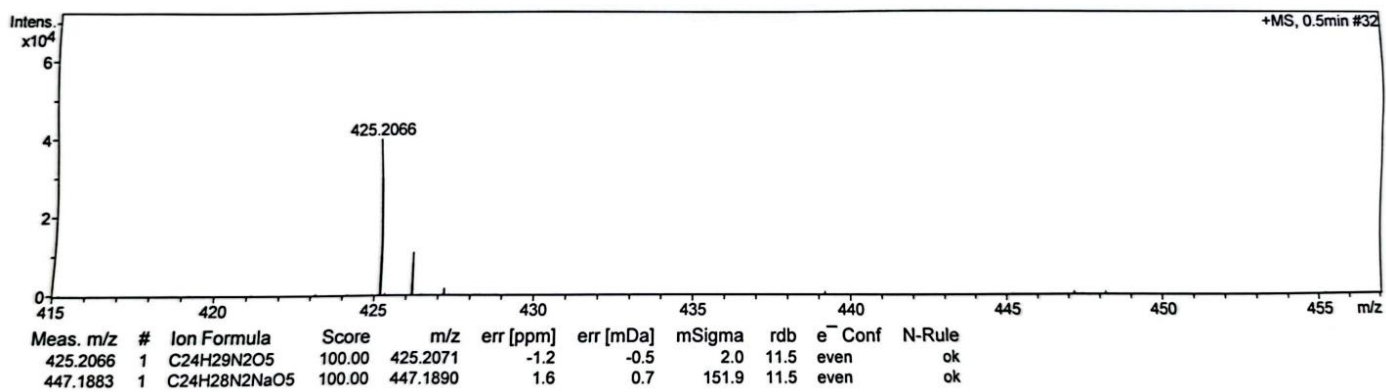

Figure S20. HRESI-MS spectrum of 4

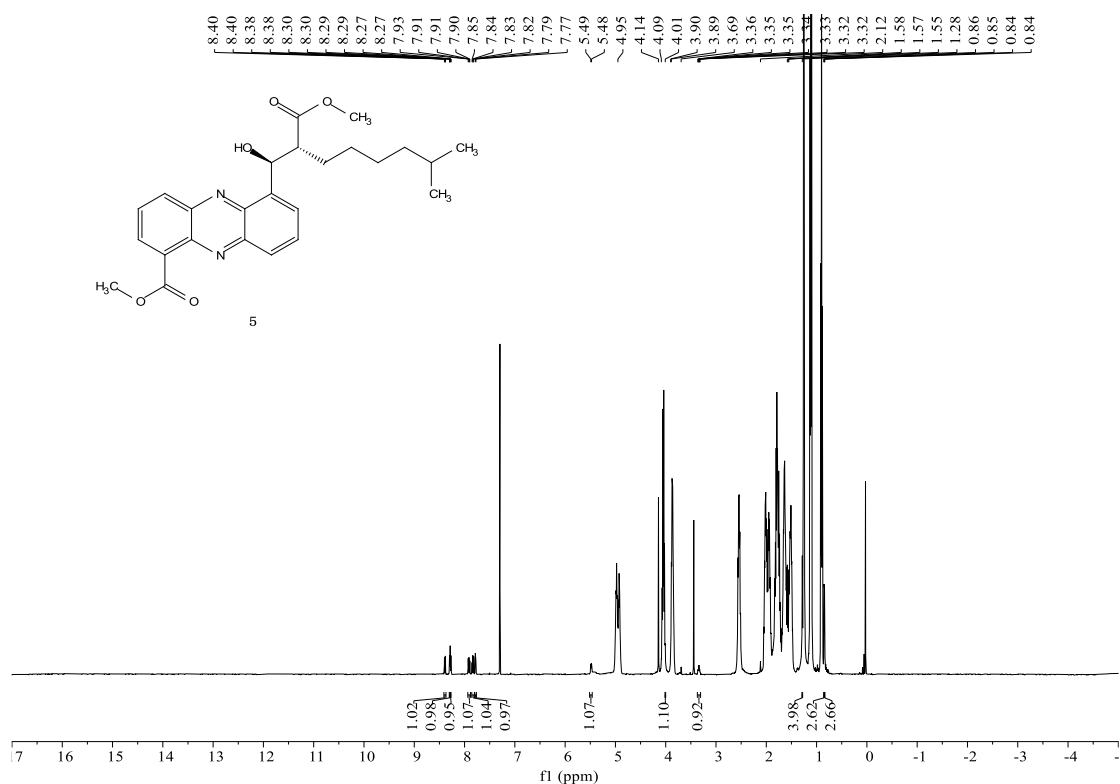

Figure S21. <sup>1</sup>H NMR (700 MHz, Chloroform-*d*) spectrum of 5

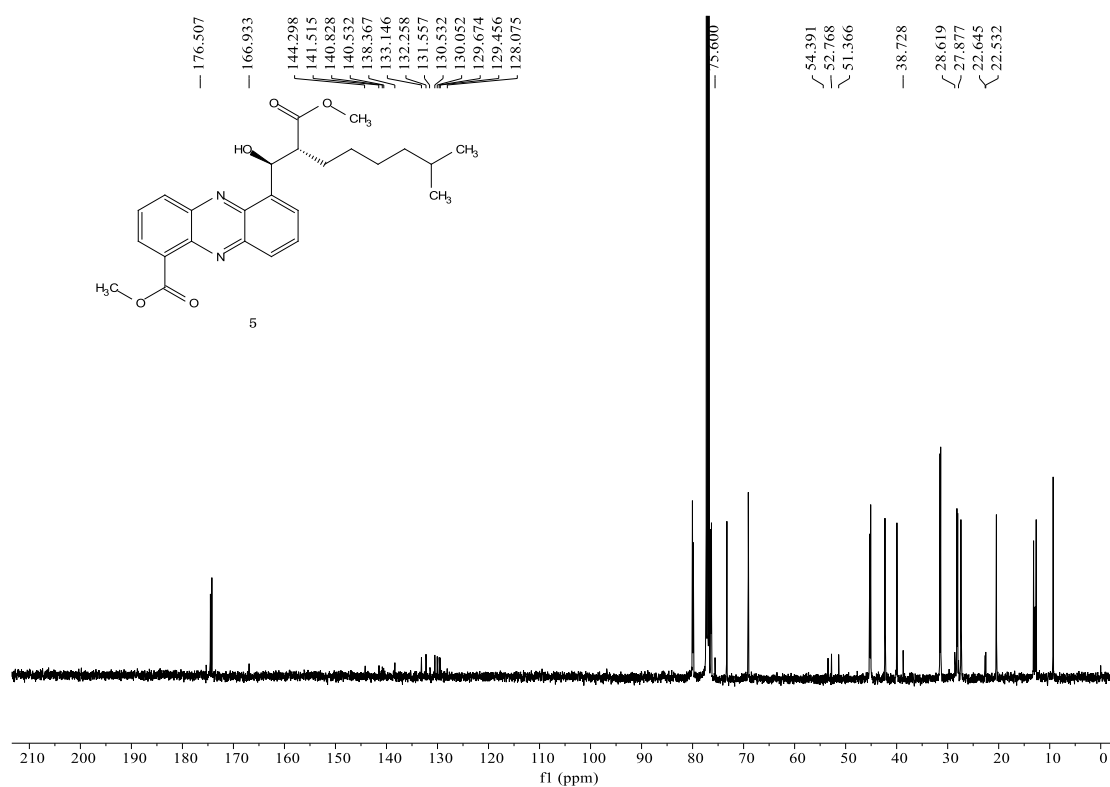

**Figure S22.**  $^{13}\text{C}$  NMR (176MHz, Chloroform-*d*) spectrum of **5**

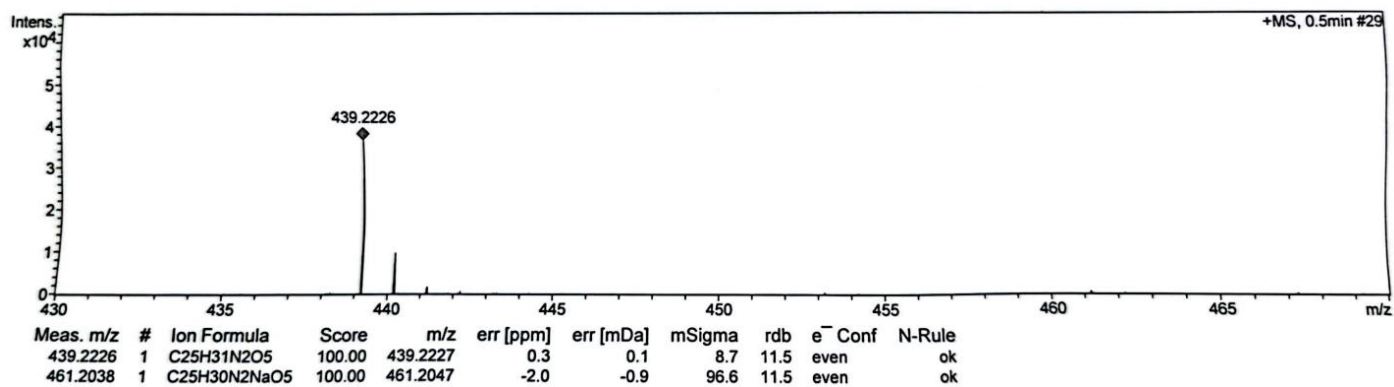

**Figure S23.** HRESI-MS spectrum of **5**

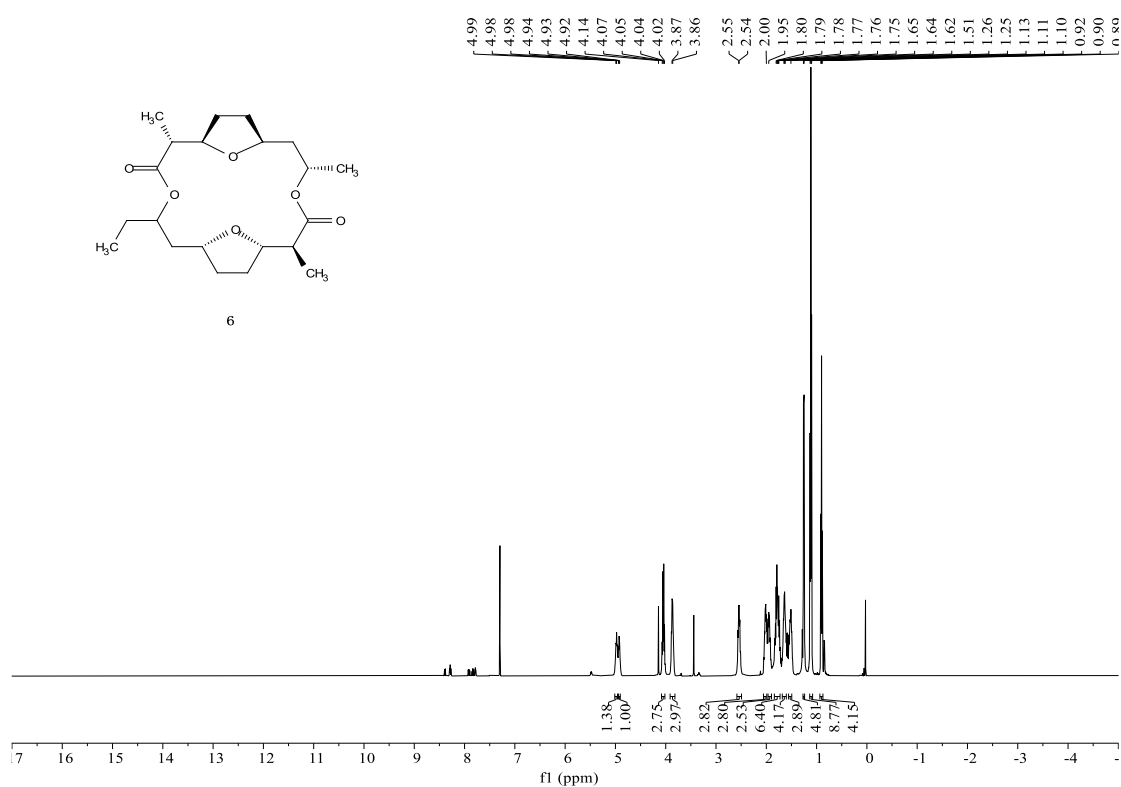

**Figure S24.**  $^1\text{H}$  NMR (700 MHz,  $\text{CDCl}_3$ ) spectrum of **6**

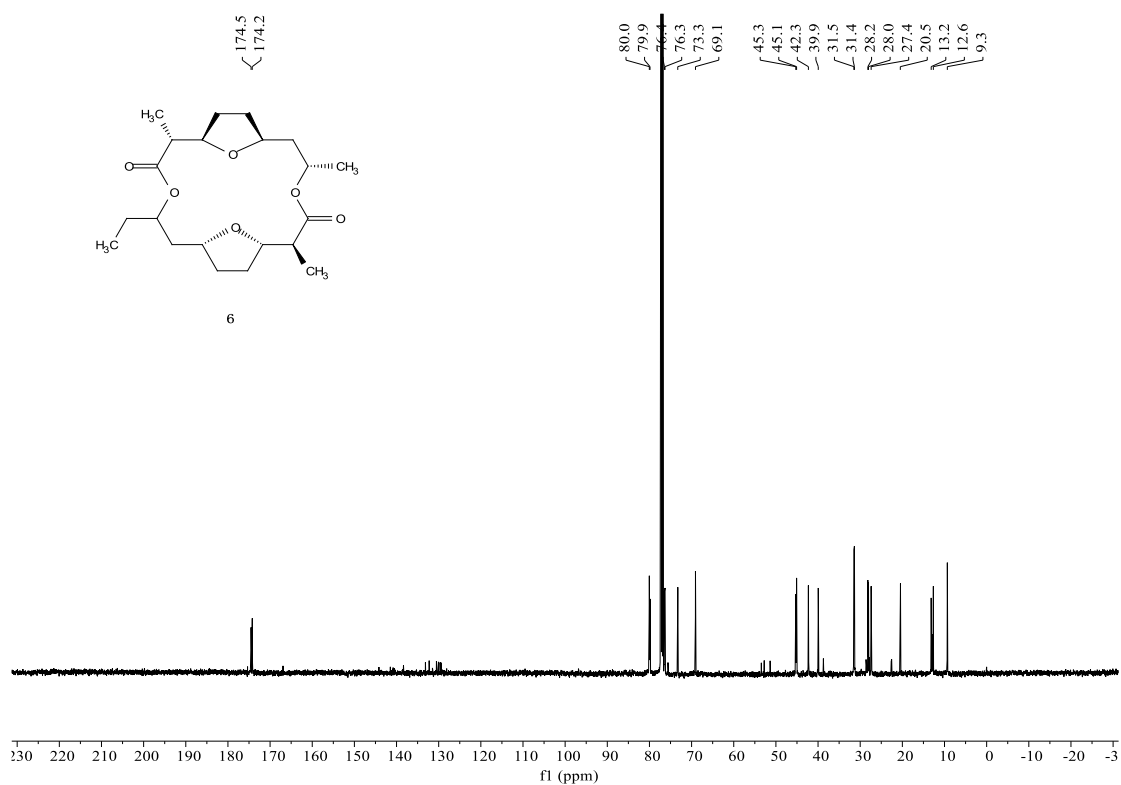

**Figure S25.**  $^{13}\text{C}$  NMR (176 MHz,  $\text{CDCl}_3$ ) spectrum of **6**
